# Supplementary material for: USF1 and hSET1A Mediated Epigenetic Modifications Regulate Lineage Differentiation and HoxB4 Transcription
Source: PubMed Central journal article supplement (PMC3675019; doi:10.1371/journal.pgen.1003524), 2013-06-06

**A HSC population:**

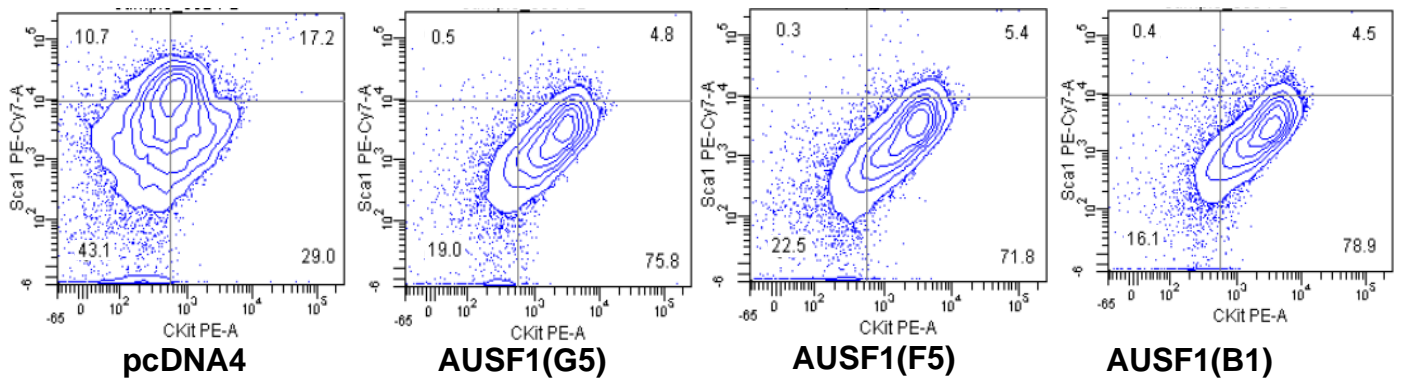

**B**

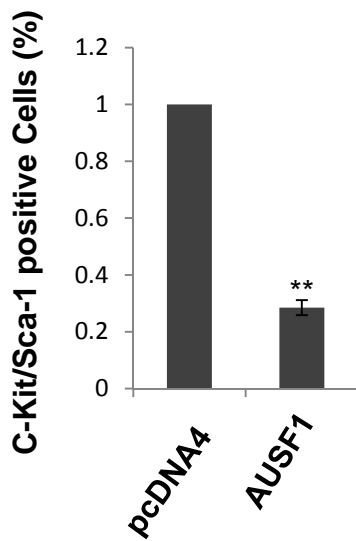

**D**

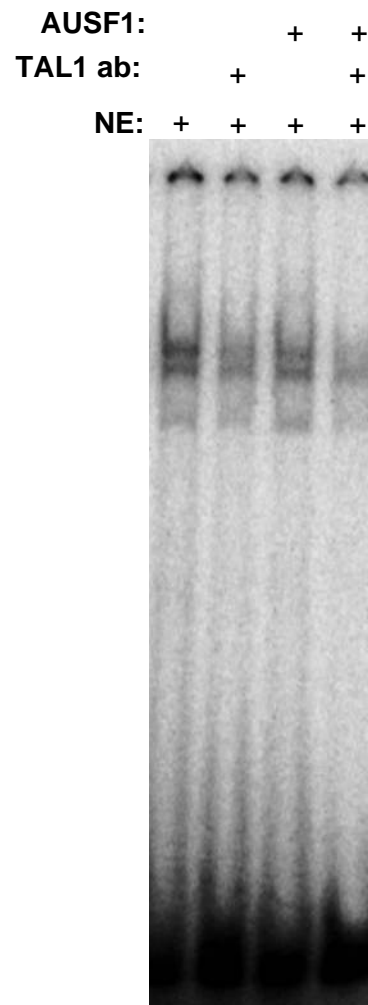

**C**

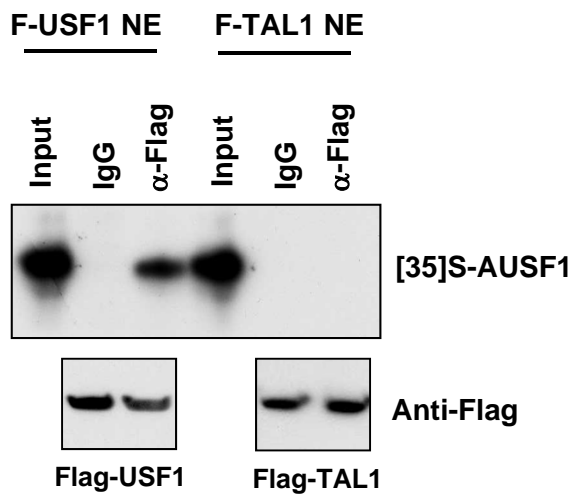

Supplement: pgen.1003524.s007.pdf [file pgen.1003524.s007.pdf]
