# Supplementary material for: USF1 and hSET1A Mediated Epigenetic Modifications Regulate Lineage Differentiation and HoxB4 Transcription
Source: PubMed Central journal article supplement (PMC3675019; doi:10.1371/journal.pgen.1003524), 2013-06-06

**A**

**Alkaline Phosphatase (AP) staining**

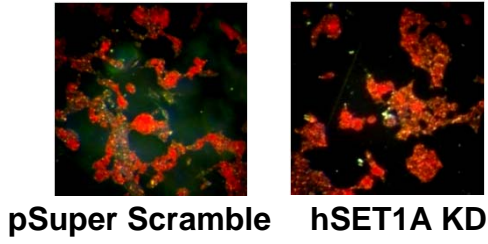

**B**

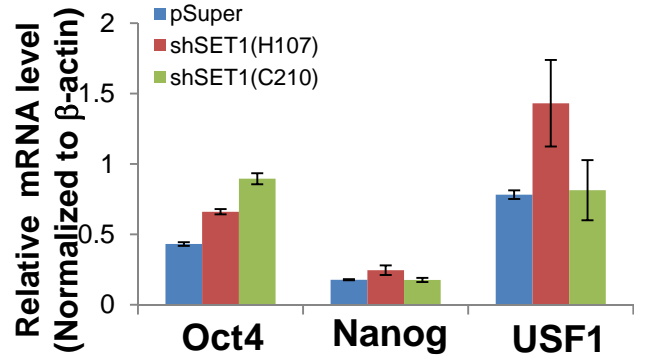

**C**

**HS/PC Population:**

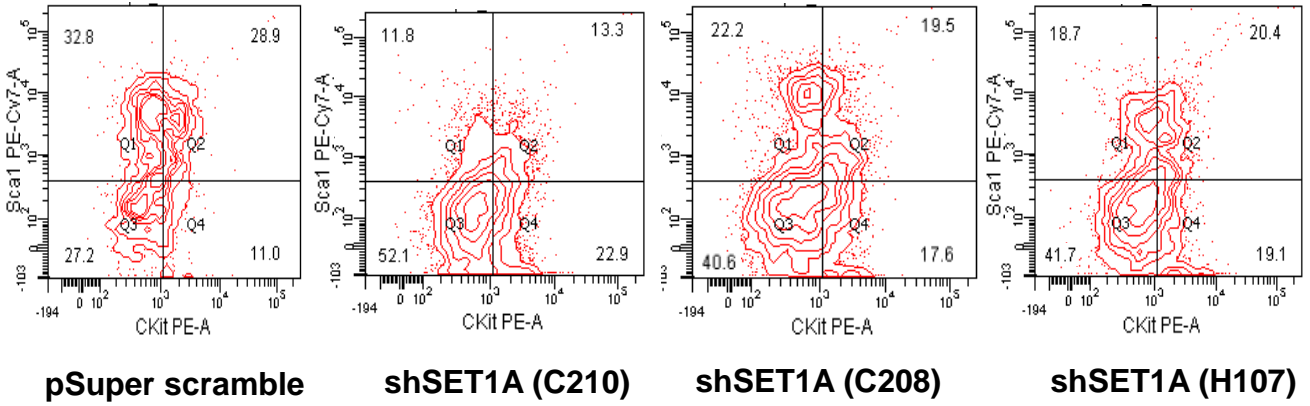

**D**

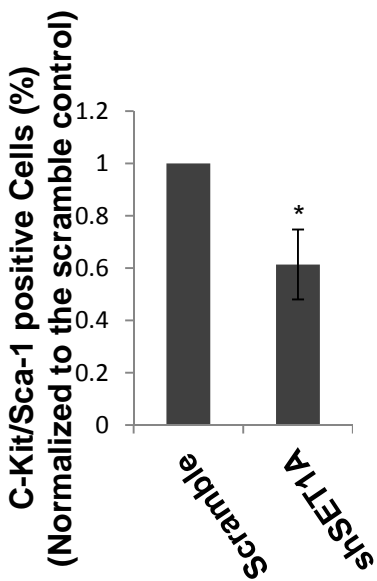

Supplement: pgen.1003524.s008.pdf [file pgen.1003524.s008.pdf]
