# Supplementary material for: USF1 and hSET1A Mediated Epigenetic Modifications Regulate Lineage Differentiation and HoxB4 Transcription
Source: PubMed Central journal article supplement (PMC3675019; doi:10.1371/journal.pgen.1003524), 2013-06-06

**A**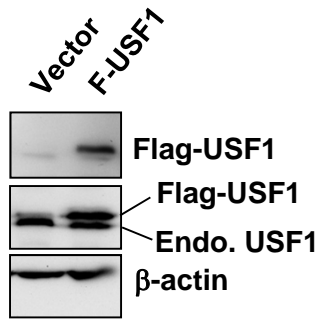**B**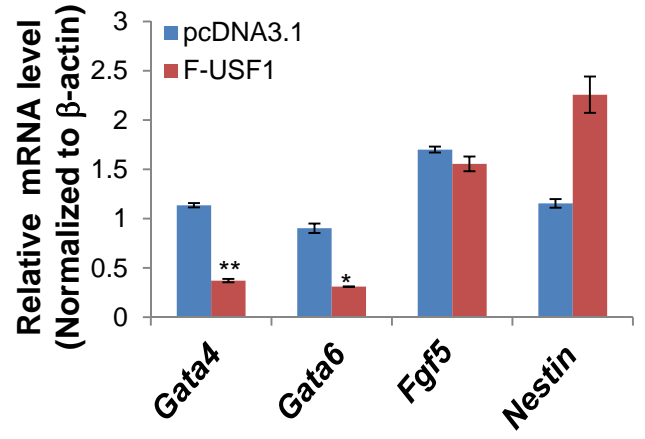**C**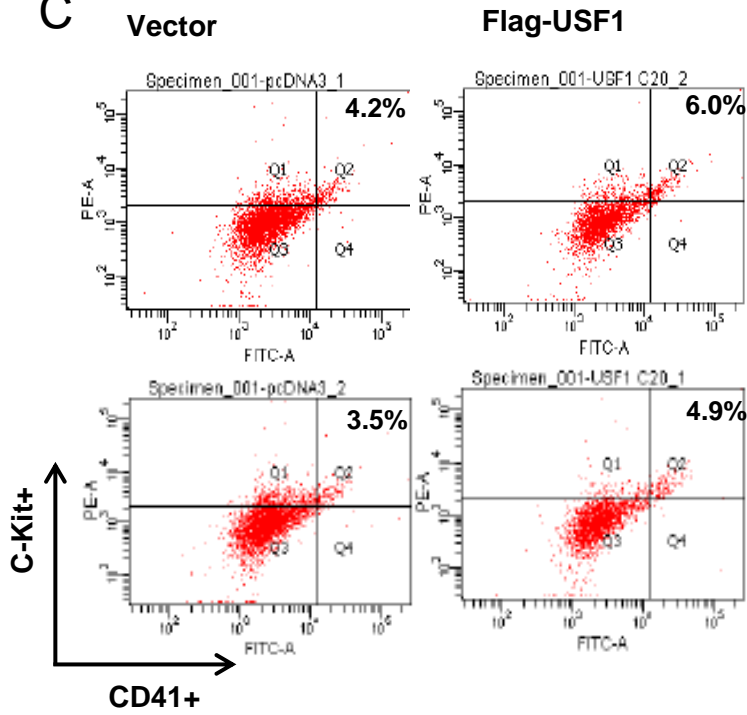**D**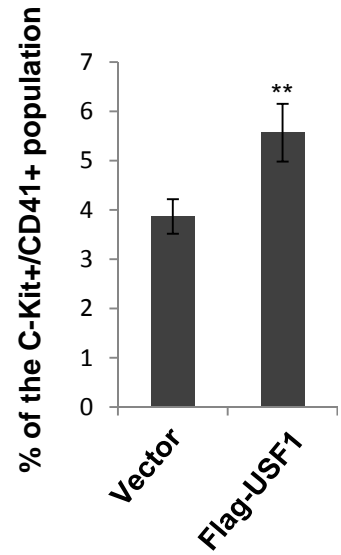**E**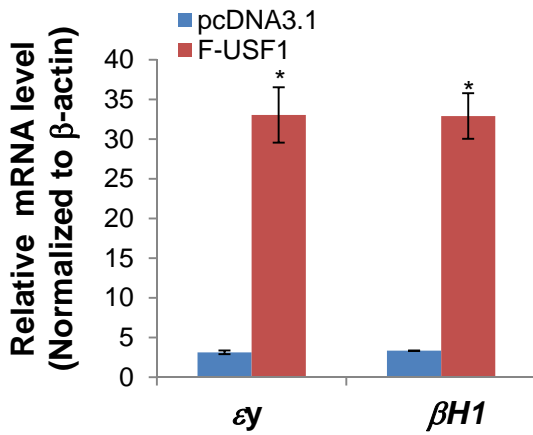

Supplement: pgen.1003524.s009.pdf [file pgen.1003524.s009.pdf]
