# Supplementary material for: USF1 and hSET1A Mediated Epigenetic Modifications Regulate Lineage Differentiation and HoxB4 Transcription
Source: PubMed Central journal article supplement (PMC3675019; doi:10.1371/journal.pgen.1003524), 2013-06-06
Supplement: pgen.1003524.s010.pdf [file pgen.1003524.s010.pdf]

**Table S1. Primer sequences:**

|        | <i>Primer</i>                        | <i>Primer sequences</i>                                          |
|--------|--------------------------------------|------------------------------------------------------------------|
| shRNA  | Human SET1A-1                        | Target: 5' GGAAAGAGCCATCGGAAAT 3'                                |
|        | Human SET1A-2                        | Target: 5' GACAACAACGAATGAAATA3'                                 |
|        | Human SET1A-3                        | Target: 5' CAACGACTCAAAGTATATA 3'                                |
|        | Mouse SET1A-1                        | Target: 5' GCAAGAAGGAGAAAGATAA 3'                                |
|        | Mouse SET1A-2                        | Target: 5' CGGAAAGAGCCATCAGAAA 3'                                |
|        | shScramble                           | Target: 5' TAGCGACTAAACACATCAA 3'                                |
| RT-PCR | Mouse $\beta$ -actin                 | For: GTGGGCCGCTCTAGGCACCA<br>Rev: TGGCCTTAGGGTGCAGGGGG           |
|        | Human $\beta$ -actin                 | For: AGAAAATCTGGCACCACACC<br>Rev: AGAGGCGTACAGGGATAGCA           |
|        | HoxB4<br>(both for human &<br>mouse) | For: TGGATGCGCAAAGTTCACG<br>Rev: GGTCTTTTTTCCACTTCATGCG          |
|        | Human Meis1                          | For: TCACACTGGCCTTAAAGAGGA<br>Rev: CCGTAATGGGGTAGATCGTC          |
|        | Human HoxB3                          | For: AGTACAAGAAGGACCAGAAGGC<br>Rev: TGGAGTGTAAGGCGTTCATG         |
|        | Human HoxC9                          | For: ACGAGGAAGAAGCGCTGCCCC<br>Rev: GAGAACCCGGGCCACCTCATA         |
|        | Mouse Oct4                           | For: GGC GTTCTCTTTGGAAAGGTGTTC<br>Rev: CTCGAACCACATCCTTCTCT      |
|        | Mouse Nanog                          | For: AGGGTCTGCTACTGAGATGCTCTG<br>Rev: CAACCACTGGTTTTTCTGCCACCG   |
|        | Mouse USF1                           | For: GATGAGAAACGGAGGGCTCAACATA<br>Rev: TTAGTTGCTGTCATTCTTGATGACG |
|        | Mouse SET1A                          | For: CAGACGGGCTTGTAGATTCC<br>Rev: GAGGCTGTGGTACACTAGG            |
|        | Mouse Tal1                           | For: TAGCCTTAGCCAGCCGCTCG<br>Rev: GCGGAGGATCTCATTCTTGC           |
|        | Mouse CD41                           | For: GAACCTGGAAGAAGCTGGCG<br>Rev: CTCCACTGTGGCTTCAGCTTG          |
|        | Mouse T                              | For: GCTCTAAGGAACCACCGGTCATC<br>Rev: ATGGGACTGCAGCATGGACAG       |
|        | Mouse FLK1                           | For: ACTGCAGTGATTGCCATGTTCT<br>Rev: TCATTGGCCCCGCTTAACG          |
|        | Mouse GATA4                          | For: GATGGGACGGGACACTACCTG<br>Rev: ACCTGCTGGCGTCTTAGATTT         |
|        | Mouse GATA6                          | For: GACGGCACCGGTCATTACC<br>Rev: ACAGTTGGCACAGGACAGTCC           |
|        | Mouse FGF5                           | For: ACCCGGATGGCAAAGTCAA<br>Rev: CAATCCCCTGAGACACAGCAA           |
|        | Mouse Nestin                         | For: CTGCAGGCCACTGAAAAGTT<br>Rev: GACCCTGCTTCTCCTGCTC            |

|                        |                                                                |
|------------------------|----------------------------------------------------------------|
| Mouse CD34             | For: CTCTAGATCACAGTTCTGTGTCAGC<br>Rev: TAGCACAGAACTTCCCAGCAAAC |
| Mouse c-Myb            | For: AACGAGCTGAAGGGACAGCA<br>Rev: TGGCATGGTGTCTCCCAA           |
| Mouse CD150            | For: ACAGGCGTGCTTATGAAGTAGATG<br>Rev: CCACGGGATCTCTG CTTCATAT  |
| Mouse $\epsilon\gamma$ | For: AACCTCATCAATGGCCTGTGG<br>Rev: TCAGTGGTACTTGTGGGACAGC      |
| Mouse $\beta$ H1       | For: AGTCCCCATGGAGTCAAAGA<br>Rev: CTCAAGGAGACCTTTGCTCA         |
| Mouse MixL1            | For: AACCGACGGGCCAAGTC<br>Rev: TCCCCGCCTTGAGGATAAG             |
| Mouse Mesp1            | For: GTTCCTGTACGCAGAAACAGCATC<br>Rev: CAAGGAGGGTTGGAATGGTACAGT |
| Mouse Snai2            | For: CTTTACCAGTGGCCTTTCTC<br>Rev: CCACAGATCTTGCAGACACAA        |
| Mouse Eomes            | For: ACCAATAACAAAGGTGCAAACAAC<br>Rev: TGGTATTTGTGCAGAGACTGCAA  |
| Mouse NKX2-5           | For: CAGTGGAGCTGGACAAAGCC<br>Rev: TAGCGACGGTTCTGGAACCA         |

|      |                                               |                                                                |
|------|-----------------------------------------------|----------------------------------------------------------------|
| CHIP | HoxB4 Promoter<br>(both for human &<br>mouse) | For: GCCTCTAACTTTGTTCACTTGAC<br>Rev: AGCCATTAATTTCTGGGAATTGC   |
|      | Human HoxB4 3'UTR                             | For: CCCCGGAAAATCTATCTGC<br>Rev: CCAAAGCTGAAAACGAGGAG          |
|      | mouse HoxB4 -5.8kb                            | For: AGGGGGCTGTATGTGTGAAG<br>Rev: GGGAGAGAAAATCGTGTGGA         |
|      | mouse HoxB1 US                                | For: AGGAAGATGAATCAAGAAG<br>Rev: CAGAAGCACTAAGAGAAG            |
|      | mouse Tal1 Pro1a                              | For: AGGCTAGACAACGGCCAAAG<br>Rev: AAACAACCCGACTCGGATCTC        |
|      | mouse Runx1 P1                                | For: CACAAATAACAACAGGATCTGAAAGC<br>Rev: TCCCCTGCCTCAGTCTTTTCT  |
|      | mouse Runx1 P2                                | For: CCCAGGCTGATACCGGAAA<br>Rev: TCCCTCAGCTCGTTTGCATA          |
|      | mouse EPB4.2                                  | For: GCAGGTCATCTCAAAGAGC<br>Rev: CGAACCCAACTCTGAACCTC          |
|      | Human necdin pro                              | For: TTCGTCCAAATGAATTACCTGAAG<br>Rev: GGAGCCCCAAAAGAACTCGTA    |
|      | mouse Tal1 -10kb                              | For: CAAATCAGAAGAAAAGACCTGCAA<br>Rev: TTTCATTTTCCTTCCCTCAATCTC |

---
